# Supplementary material for: Impaired cellular bioenergetics caused by GBA1 depletion sensitizes neurons to calcium overload
Source: PubMed Central journal article supplement (PMC7206133; doi:10.1038/s41418-019-0442-2), 2019-11-04
Supplement: 41418_2019_442_MOESM1_ESM.pdf [file 41418_2019_442_MOESM1_ESM.pdf]

Please complete the table below to indicate the contributions of all named authors to the figures.

Figure 1:

|  |
|--|
|  |
|--|

Figure 2:

|  |
|--|
|  |
|--|

Figure 3:

|  |
|--|
|  |
|--|

Figure 4:

|  |
|--|
|  |
|--|

Figure 5:

|  |
|--|
|  |
|--|

Figure 6:

|  |
|--|
|  |
|--|

Signed for and on behalf of the Author(s):



Print Name:

Date:
